# Supplementary material
Source: publisher site journal article supplement (https://www.dovepress.com/article/536964)
Supplement: Supplementary file 1 [file 536964%20Revised%20Appendix.docx]

**Appendix1** Search strategies and results for systematic reviews on treatments of liver cancer

1. **Medline (Ovid MEDLINE(R) 1946 to October 10, 2023 )**

|  | Search Statement | Results |
| --- | --- | --- |
| 1 | MEDLINE.tw. | 144423 |

| 2 | systematic review.tw. | 223016 |
| --- | --- | --- |
| 3 | meta analysis.pt. | 189464 |
| 4 | 1 or 2 or 3 | 374521 |
| 5 | liver cancer.mp. or exp Liver Neoplasms/ | 201789 |
| 6 | 4 and 5 | 3312 |
| 7 | limit 6 to humans | 3096 |
| 8 | limit 7 to yr="2014 -Current" | 2327 |

1. **Embase (1910 to** **October, 2023)**

|  | Search Statement | Results |
| --- | --- | --- |

| 1 | liver cancer.mp. or exp liver cancer/ | 328089 |
| --- | --- | --- |
| 2 | meta-analysis.tw. | 309863 |
| 3 | systematic review.tw. | 337674 |
| 4 | 2 or 3 | 493983 |
| 5 | 1 and 4 | 6440 |
| 6 | limit 5 to human | 6289 |
| 7 | limit 6 to yr="2014 -Current" | 5231 |

1. **APA PsycInfo (1806 to October Week 2 2023)**

|  | Search Statement | Results |
| --- | --- | --- |

| 1 | exp Liver/ or exp Neoplasms/ or liver cancer.mp. or exp Liver Disorders/ | 68716 |
| --- | --- | --- |
| 2 | meta-analysis.tw. | 42452 |
| 3 | search:.tw. | 127820 |
| 4 | 2 or 3 | 156236 |
| 5 | 1 and 4 | 3360 |
| 6 | limit 5 to human | 3235 |
| 7 | limit 6 to yr="2014 -Current" | 2116 |

1. **Cochrane Database of Systematic Reviews**

|  | Search Statement | Results |
| --- | --- | --- |

| 1 | MeSH descriptor: [Carcinoma, Hepatocellular] explode all trees | 2433 |
| --- | --- | --- |
| 2 | 1 in Cochrane Reviews | 19 |
| 3 | 2 with Cochrane Library publication date Between Jan 2014 and Oct 2023, in Cochrane Reviews | 12 |

**Appendix 2** Data extraction form for bibliographical characteristics

| 1. Is this a Cochrane review? Yes / No |
| --- |
| 1. Is there an update of previous review? Yes / No |
| 1. Has harm been considered in the systematic review? Yes / No |
| 1. Did the authors of the systematic review search for English databases? Yes / No |
| 1. Did the authors of the systematic review search for non-English databases? Yes / No |
| 1. Is there any PRISMA-like flow diagram in the review? Yes / No |
| 1. Year of systematic review’s publication: _____ |
| 1. Impact factor of systematic review’s journal in the year before its publication: ____ |
| 1. Number of the review’s authors: _____ |
| 1. Number of ALL included studies (regardless whether they have been included in meta-analysis or not):___ |
| 1. Number of participants in ALL included studies: _____ |
| 1. Location of the corresponding author: _____   a. Europe b. America c. Asia d. Oceania e. Africa f. Not reported |
| 1. Funding location of the systematic review: _____   a. Europe b. America c. Asia d. Oceania e. Africa f. Not reported g. not applicable |
| 1. Type of the treatment/interventions:   a. Non-pharmacological b. Pharmacological c. Both types |
| 1. Was “year of coverage” reported?   a. Yes (reported both starting and ending years) b. Partially (only reported starting years or ending years)  c. Not mentioned |
| 1. Searching terms reported:   a. No search term  b. Topics/free text/keywords/MeSH  c. Full Boolean  d. Readers are referred elsewhere for full search strategy |
| 1. Eligibility of study design:   a. RCT only  b. Observational studies only  c. RCT and observational studies  d. Not mentioned |
| 1. This systematic review included primary studies of the following languages:   a. English only b. Language other than English c. English and language other than English  d. Language criteria not reported |
| 1. Quality of the primary studies is assessed by which tools?   a. Cochrane risk of bias 1.0  b. Cochrane risk of bias 2.0  c.Jadad scale  d. Schulz approach  e. Effective Public Health Practice Project Quality Assessment Tool (EPHPP)  f. Juni  g. Chalmer scale  h. Pedro Scale  i. Delphi list  j. More than one tool  k. Others |
| 1. Publication language:   a. English  b. Chinese |

Notes: PRISMA, Preferred Reporting Items for Systematic Reviews and Meta-Analyses; MeSH, Medical Subject Headings; RCT, randomised controlled trial; RoB, Risk of bias

**Appendix 3** AMSTAR 2 critical appraisal form & rating of overall methodological quality

| 1. **Did the research questions and inclusion criteria for the review include the components of PICO?**  | For Yes  o Population  o Intervention  o Comparator group  o Outcome | Optional (recommended)  o Timeframe for follow-up | **o Yes**  **o No** | | --- | --- | --- | |
| --- | --- | --- | --- |
| 1. ***Did the report of the review contain an explicit statement that the review methods were established prior to the conduct of the review and did the report justify any significant deviations from the protocol?**  | For Partial Yes:  The authors state that they had a written protocol or guide that included ALL the following:  o review question(s)  o a search strategy  o inclusion/exclusion criteria  o a RoB assessment | For Yes:  As for partial yes, plus the protocol should be registered and should also have specified:  o a meta-analysis/synthesis  plan, if appropriate, and  o a plan for investigating  causes of heterogeneity  o justification for any  deviations from the protocol | **o Yes**  **o Partial Yes**  **o No** | | --- | --- | --- | |
| 1. **Did the review authors explain their selection of the study designs for inclusion in the review?**  | For Yes, the review should satisfy ONE of the following:  o Explanation for including only RCTs  o OR Explanation for including only NRSI  o OR Explanation for including both RCTs and NRSI | **o Yes**  **o No** | | --- | --- | |
| 1. ***Did the review authors use a comprehensive literature search strategy?**  | For Partial Yes (all the following):  o searched at least 2 databases (relevant to research question)  o provided key word and/or search strategy  o justified publication restrictions (eg, language) | For Yes, should also have (all the following):  o searched the reference lists/bibliographies of included studies  o searched trial/study registries  o included/consulted content experts in the field  o where relevant, searched for grey literature  o conducted search within 24 months of completion of the review | **o Yes**  **o Partial Yes**  **o No** | | --- | --- | --- | |
| 1. **Did the review authors perform study selection in duplicate?**  | For Yes, either ONE of the following:  o at least two reviewers independently agreed on selection of eligible studies and achieved consensus on which studies to include  o OR two reviewers selected a sample of eligible studies and achieved good agreement (at least 80 per cent), with the remainder selected by one reviewer | **o Yes**  **o No** | | --- | --- | |
| 1. **Did the review authors perform data extraction in duplicate?**  | For Yes, either ONE of the following:  o at least two reviewers achieved consensus on which data to extract from included studies  o OR two reviewers extracted data from a sample of eligible studies and achieved good agreement (at least 80 per cent), with the remainder extracted by one reviewer | **o Yes**  **o No** | | --- | --- | |
| 1. ***Did the review authors provide a list of excluded studies and justify the exclusions?**  | For Partial Yes:  o provided a list of all potentially relevant studies that were read in full text form but excluded from the review | For Yes, must also have:  o Justified the exclusion from the review of each potentially relevant study | **o Yes**  **o Partial Yes**  **o No** | | --- | --- | --- | |
| 1. **Did the review authors describe the included studies in adequate detail?**  | For Partial Yes (ALL the following):  o described populations  o described interventions  o described comparators  o described outcomes  o described research designs | For Yes, should also have ALL the following:  o described populations in detail  o described intervention and comparator in detail (including does where relevant)  o described study’s setting  o timeframe for follow-up | **o Yes**  **o Partial Yes**  **o No** | | --- | --- | --- | |
| 1. ***Did the review authors use a satisfactory technique for assessing the RoB in individual studies that were included in the review?**  | For Partial Yes, must have assessed RoB from  o unconcealed allocation, *and*  o lack of blinding of patients and assessors when assessing outcomes (unnecessary for objective outcomes such as all cause mortality) | For Yes, must also have assessed RoB from:  o allocation sequence that was not truly random, *and*  o selection of the reported result from among multiple measurements or analyses of a specified outcome | **o Yes**  **o Partial Yes**  **o No** | | --- | --- | --- | |
| 1. **Did the review authors report on the sources of funding for the studies included in the review?**  | For Yes  o Must have reported on the sources of funding for individual studies included in the review. Note: Reporting that the reviewers looked for this information but it was not reported by study authors also qualifies | **o Yes**  **o No** | | --- | --- | |
| 1. ***If meta-analysis was performed did the review authors use appropriate methods for statistical combination of results?**  | **RCTs**  For Yes:  o The authors justified combining the data in a meta-analysis  o AND they used an appropriate weighted technique to combine study results and adjusted for heterogeneity if present  o AND investigated the causes of any heterogeneity  **11a.For No in Q.11, Is the inappropriateness evaluated because of the use of the fixed-effect meta-analysis model for combining data? (yes/no)** | **o Yes**  **o No**  **o No meta-analysis conducted** | | --- | --- | |
| 1. **If meta-analysis was performed, did the review authors assess the potential impact of RoB in individual studies on the results of the meta-analysis or other evidence synthesis?**  | For Yes  o included only low RoB RCTs  o OR, if the pooled estimate was based on RCTs and/or NRSI at variable RoB, the authors performed analyses to investigate possible impact of RoB on summary estimates of effect | **o Yes**  **o No**  **o No meta-analysis conducted** | | --- | --- | |
| 1. ***Did the review authors account for RoB in individual studies when interpreting/discussing the results of the review?**  | For Yes:  o included only low RoB RCTs  o OR, if RCTs with moderate or high RoB, or NRSI were included the review provided a discussion of the likely impact of RoB on the results | **o Yes**  **o No** | | --- | --- | |
| 1. **Did the review authors provide a satisfactory explanation for, and discussion of, any heterogeneity observed in the results of the review?**  | For Yes:  o There was no significant heterogeneity in the results  o OR if heterogeneity was present the authors performed an investigation of sources of any heterogeneity in the results and discussed the impact of this on the results of the review | **o Yes**  **o No** | | --- | --- | |
| 1. ***If they performed quantitative synthesis did the review authors carry out an adequate investigation of publication bias (small study bias) and discuss its likely impact on the results of the review?**  | For Yes:  o performed graphical or statistical tests for publication bias and discussed the likelihood and magnitude of impact of publication bias  **15a.For No in Q.15, Is the missing of graphical or statistical test for publication bias because of less than 10 individual studies in meta-analysis? (yes/no)** | **o Yes**  **o No**  **o No meta-analysis conducted** | | --- | --- | |
| 1. **Did the review authors report any potential sources of conflict of interest, including any funding they received for conducting the review?**  | For Yes:  o The authors reported no competing interests OR  o The authors described their funding sources and how they managed potential conflicts of interest | **o Yes**  **o No** | | --- | --- |   **Rating of overall methodological quality**  **Critical items(marked with *): 2, 4, 7, 9, 11, 13, 15;**  **Non-critical items: 1,3, 5, 6, 8, 10, 12, 14, 16.**  **High**  *No or one non-critical weakness*: the systematic review provides an accurate and comprehensive summary of the results of the available studies that address the question of interest  **Moderate**  *More than one non-critical weakness*: the systematic review has more than one weakness but no critical flaws. It may provide an accurate summary of the results of the available studies that were included in the review  **Low**  *One critical flaw with or without non-critical weaknesses*: the review has a critical flaw and may not provide an accurate and comprehensive summary of the available studies that address the question of interest  **Critically low**  *More than one critical flaw with or without non-critical weaknesses*: the review has more than one critical flaw and should not be relied on to provide an accurate and comprehensive summary of the available studies  Multiple non-critical weaknesses may diminish confidence in the review and it may be appropriate to move the overall appraisal down from moderate to low confidence |

**Note:** * Critical methodological items

**Abbreviations:** RCT, randomised controlled trial; NRSI, non-randomised studies of interventions; RoB, risk of bias.

*Reference: Shea BJ, Reeves BC, Wells G, Thuku M, Hamel C, Moran J, et al. AMSTAR 2: a critical appraisal tool for systematic reviews that include randomised or non-randomised studies of healthcare interventions, or both. BMJ. 2017;358:j4008.*

**Appendix 4** List of included 119 systematic reviews

1 Cao JH, Zhou J, Zhang XL, Ding X, Long QY. Meta-analysis on radiofrequency ablation in combination with transarterial chemoembolization for the treatment of hepatocellular carcinoma. J Huazhong Univ Sci Technolog Med Sci. 2014 Oct;34(5):692-700.

2 Cheng X, Sun P, Hu QG, Song ZF, Xiong J, Zheng QC. Transarterial (chemo)embolization for curative resection of hepatocellular carcinoma: A systematic review and meta-analyses. Journal of Cancer Research and Clinical Oncology. 2014;140(7):1159-70.

3 Fu F, Wan Y, Mulati, Wu T. Kanglaite injection combined with hepatic arterial intervention for unresectable hepatocellular carcinoma: A meta-analysis. Journal of Cancer Research and Therapeutics. 2014;10(5):C38-C41.

4 Liu Z, Gao F, Yang G, Singh S, Lu M, Zhang T, et al. Combination of radiofrequency ablation with transarterial chemoembolization for hepatocellular carcinoma: an up-to-date meta-analysis. Tumor Biology. 2014;35(8):7407-13.

5 Meng J, Zhong J, Zhang H, Zhong W, Huang Z, Jin Y, et al. Pre-, peri-, and postoperative oral administration of branched-chain amino acids for primary liver cancer patients for hepatic resection: A systematic review. Nutrition and Cancer. 2014;66(3):517-22.

6 Ni JY, Sun HL, Luo JH, Wang WD, Chen YT, Xu LF. Meta-analysis of randomized controlled trials: percutaneous radiofrequency ablation in the treatment of hepatocullular carcinoma. Chinese Journal of Cancer Prevention and Treatment. 2014;21(9):711-7.

7 Ou SQ, Chen ZY, Ma YL, Meng ZB. Meta-analysis of comparative study between doxoruibcin-eluting beads and conventional transarterial hemoembolization for hepatocellular carcinoma. Chinese Journal of Interventional Imaging and Therapy. 2014;11(11):712-6.

8 Peng S, Zhao Y, Xu F, Jia C, Xu Y, Dai C. An updated meta-analysis of randomized controlled trials assessing the effect of sorafenib in advanced hepatocellular carcinoma. PLoS ONE. 2014;9(12):e112530.

9 Qi X, Tang Y, An D, Bai M, Shi X, Wang J, et al. Radiofrequency ablation versus hepatic resection for small hepatocellular carcinoma: A meta-analysis of randomized controlled trials. Journal of Clinical Gastroenterology. 2014;48(5):450-7.

10 Sun P, Yang X, He RQ, Hu QG, Song ZF, Xiong J, et al. Antiviral therapy after curative treatment of hepatitis B/C virus-related hepatocellular carcinoma: A systematic review of randomized trials. Hepatology Research. 2014;44(3):259-69.

11 Xie Z-B, Ma L, Wang X-B, Bai T, Ye J-Z, Zhong J-H, et al. Transarterial embolization with or without chemotherapy for advanced hepatocellular carcinoma: a systematic review. Tumour biology : the journal of the International Society for Oncodevelopmental Biology and Medicine. 2014;35(9):8451-9.

12 Xu RH, Gao W, Wang C, Guo DK, Tang L, Zhang H, et al. Systematic evaluation of percutaneous radiofrequency ablation versus percutaneous ethanol injection for the treatment of small hepatocellular carcinoma: A meta-analysis. European Journal of Medical Research. 2014;19(1):39.

13 Fu C, Liu N, Deng Q, Li X, Ma K, Bie P. Radiofrequency ablation vs. surgical resection on the treatment of patients with small hepatocellular carcinoma: A system review and meta-analysis of five randomized controlled trials. Hepato-Gastroenterology. 2014;61(134):1722-9.

14 Chen ZY, Liang J, Deng X. Efficacy and safety of thalidomide combined with transcatheter arterial chemoembolization for primary hepatic carcinoma: A systematic review. World Chinese Journal of Digestology. 2015;23(2):291-307.

15 Fu Y, Zhao X, Yun Q, Zhu X, Zhu Y, Li Q, et al. Transarterial chemoembolization (TACE) plus percutaneous ethanol injection (PEI) for the treatment of unresectable hepatocellular carcinoma: A meta-analysis of randomized controlled trials. International Journal of Clinical and Experimental Medicine. 2015;8(7):10388-400.

16 Gao LB, Tian H, Wang XG, Yu XF, Guan Y, Chen ML, et al. Early enteral and parenteral nutritional support after hepatectomy in patients with hepatic carcinoma: A systematic review and meta-analysis. OncoTargets and Therapy. 2015;8:623-31.

17 Li Z, Mi DH, Yang KH, Cao N, Tian JH, Ma B, et al. Effectiveness and safety of TACE combined with MWA for primary hepatic cancer; A systematic review. Journal of Interventional Radiology (China). 2015;24(11):957-63.

18 Shao YY, Shau WY, Chan SY, Lu LC, Hsu CH, Cheng AL. Treatment efficacy differences of sorafenib for advanced hepatocellular carcinoma: A meta-analysis of randomized clinical trials. Oncology (Switzerland). 2015;88(6):345-52.

19 Xu J, Li J, Chen J, Liu ZJ. Effect of adjuvant interferon therapy on hepatitis B/C virus-related hepatocellular carcinoma after curative therapy - Meta-analysis. Advances in Clinical and Experimental Medicine. 2015;24(2):331-40.

20 Yang B, Zan RY, Wang SY, Li XL, Wei ML, Guo WH, et al. Radiofrequency ablation versus percutaneous ethanol injection for hepatocellular carcinoma: A meta-analysis of randomized controlled trials. World Journal of Surgical Oncology. 2015;13(1):96.

21 Zheng RN, You ZJ, Lin SH, Jia J, Cai YM, Liu C, et al. Efficacy of percutaneous radiofrequency ablation for the treatment of hepatocellular carcinoma. Genetics and Molecular Research. 2015;14(4):17982-94.

22 Abdel-Rahman OM, Elsayed Z. Yttrium-90 microsphere radioembolisation for unresectable hepatocellular carcinoma. The Cochrane database of systematic reviews. 2016;2:CD011313.

23 Chen QW, Ying HF, Gao S, Shen YH, Meng ZQ, Chen H, et al. Radiofrequency ablation plus chemoembolization versus radiofrequency ablation alone for hepatocellular carcinoma: A systematic review and meta-analysis. Clinics and Research in Hepatology and Gastroenterology. 2016;40(3):309-14.

24 He L, Xu Q, Chen L, Chen R. A Meta-Analysis of Arsenic Trioxide Combined with Transcatheter Arterial Chemoembolization for Treatment of Primary Hepatic Carcinoma. Evidence-based Complementary and Alternative Medicine. 2016;2016:3428370.

25. Liu F, Su QL, Yuan B, She Y, Li X. Efficacy and safety of TACE combined with PSE for HCC patients with hypersplenism: A meta-analysis. Chinese Journal of Evidence-Based Medicine. 2016;16(5):564-72.

26 Ma X, Li RS, Huang YQ, Li PY, Wang J, Su HB, et al. The therapeutic efficacy and safety of compound Kushen injection combined with transarterial chemoembolization in unresectable hepatocellular carcinoma: An update systematic review and meta-analysis. Frontiers in Pharmacology. 2016;7(MAR):70.

27 Roviello G, Zanotti L, Cappelletti MR, Gobbi A, Borsella G, Pacifico C, et al. New molecular therapies in patients with advanced Hepatocellular Cancer in second line of treatment: Is a real defeat?: Results from a literature based meta-analysis of randomized trials. Critical Reviews in Oncology/Hematology. 2016;108:62-8.

28 Si T, Chen Y, Ma D, Gong X, Yang K, Guan R, et al. Preoperative transarterial chemoembolization for resectable hepatocellular carcinoma in Asia area: a meta-analysis of random controlled trials. Scandinavian Journal of Gastroenterology. 2016;51(12):1512-9.

29 Wang H, Liu A, Bo W, Feng X, Hu Y, Tian L, et al. Adjuvant immunotherapy with autologous cytokine-induced killer cells for hepatocellular carcinoma patients after curative resection, a systematic review and meta-analysis. Digestive and Liver Disease. 2016;48(11):1275-82.

30 Wang X, Hu Y, Ren M, Lu X, Lu G, He S. Efficacy and safety of radiofrequency ablation combined with transcatheter arterial chemoembolization for hepatocellular carcinomas compared with radiofrequency ablation alone: A time-to-event meta-analysis. Korean Journal of Radiology. 2016;17(1):93-102.

31 Zeng J, Lv L, Mei ZC. Efficacy and safety of transarterial chemoembolization plus sorafenib for early or intermediate stage hepatocellular carcinoma: A systematic review and meta-analysis of randomized controlled trials. Clinics and Research in Hepatology and Gastroenterology. 2016;40(6):688-97.

32 Li L, Tian J, Liu P, Wang X, Zhu Z. Transarterial chemoembolization combination therapy vs monotherapy in unresectable hepatocellular carcinoma: A meta-analysis. Tumori. 2016;102(3):301-10.

33 Abdel-Rahman O, Elsayed Z. External beam radiotherapy for unresectable hepatocellular carcinoma. Cochrane Database of Systematic Reviews. 2017;2017(3):CD011314.

34 Cao DD, Xu HL, Liu L, Zheng YF, Gao SF, Xu XM, et al. Thalidomide combined with thanscatheter artierial chemoembolzation for primary hepatocellular carcinoma: A systematic review and meta-analysis. Oncotarget. 2017;8(27):44976-93.

35 Chen Q, Jia Z, Yang Z, Wu W, Shi H. Tace combined with MWA versus simple TACE for the treatment of large hepatic cancers: A metaanalysis of curative effect. Journal of Interventional Radiology (China). 2017;26(3):225-31.

36 Facciorusso A, Bellanti F, Villani R, Salvatore V, Muscatiello N, Piscaglia F, et al. Transarterial chemoembolization vs bland embolization in hepatocellular carcinoma: A meta-analysis of randomized trials. United European Gastroenterology Journal. 2017;5(4):511-8.

37 Kim JH, Kim BJ, Jang HJ, Lee J. Molecular targeted agents as second-line treatment for hepatocellular carcinoma: A meta-analysis and review. Oncotarget. 2017;8(60):102321-7.

38 Li J, Liu W, Zhu W, Wu Y, Wu B. Transcatheter hepatic arterial chemoembolization and sorafenib for hepatocellular carcinoma: A meta-analysis of randomized, double-blind controlled trials. Oncotarget. 2017;8(35):59601-8.

39 Li X, Zhang D, Guan S, Ye W, Liu L, Lou L. Efficacy of anti-VEGF agents in the treatment of elderly hepatocellular carcinoma: A systematic review. Oncotarget. 2017;8(54):93179-85.

40 Li Z, Zhang K, Lin SM, Mi DH, Cao N, Wen ZZ, et al. Radiofrequency ablation combined with percutaneous ethanol injection for hepatocellular carcinoma: a systematic review and meta-analysis. International Journal of Hyperthermia. 2017;33(3):237-46.

41 Liu Y, Zhuo L, Zhu B, He M, Xu Y, Wang T, et al. Transcatheter arterial chemoembolization in combination with percutaneous ablation therapy for the treatment of hepatocellular carcinoma: A meta-analysis. Journal of Interventional Radiology (China). 2017;26(9):830-5.

42 Lv XH, Wang CH, Xie Y. Arsenic trioxide combined with transarterial chemoembolization for primary liver cancer: A meta-analysis. Journal of Gastroenterology and Hepatology (Australia). 2017;32(9):1540-7.

43 Ma L, Wang B, Long Y, Li H. Effect of traditional Chinese medicine combined with Western therapy on primary hepatic carcinoma: a systematic review with meta-analysis. Frontiers of medicine. 2017;11(2):191-202.

44 Shen Z, Gu W, Cheng H, Shen W, Sun D, Zeng Y, et al. Effect of Aidi injection plus transarterial chemoembolization on primary hepatic carcinoma: a systematic review and Meta-analysis. Journal of Traditional Chinese Medicine. 2017;37(5):567-87.

45 Shi Z, Song T, Wan Y, Xie J, Yan Y, Shi K, et al. A systematic review and meta-analysis of traditional insect Chinese medicines combined chemotherapy for non-surgical hepatocellular carcinoma therapy. Scientific reports. 2017;7(1):4355.

46 Yin J, Lyu T, Guan H, Song L, Wang J, Tong X. Efficacy and safety of radiofrequency ablation combined with or without TACE for hepatocellular carcinomas: Meta-analysis. Chinese Journal of Interventional Imaging and Therapy. 2017;14(10):606-12.

47 Zhang Y-Q, Zhao F, Song L, Gan H-Y, Xie X-F. Systematic review and meta-analysis of Endostar combined with transcatheter arterial chemoembolization (TACE) versus TACE alone for hepatocellular carcinoma. Journal of Evidence-Based Complementary & Alternative Medicine. 2017;22(4):883-91.

48 Chen W, Wang Y, Liang Q, Cai Y, Chen X, Zhang Y, et al. Efficacy and Safety of Aidi Injection Combined with Transcatheter Arterial Chemoembolization on Primary Hepatic Carcinoma: A Systematic Review and Meta-Analysis. Evidence-based Complementary and Alternative Medicine. 2018;2018:6376429.

49 Dai Y, Gao S, Liu X, Gao Q, Zhang L, Fan X, et al. Effect of aidi injection plus TACE on hepatocellular carcinoma: A meta-analysis of randomized controlled trials. Evidence-based Complementary and Alternative Medicine. 2018;2018:9196409.

50 Gardini AC, Tamburini E, Inarrairaegui M, Frassineti GL, Sangro B. Radioembolization versus chemoembolization for unresectable hepatocellular carcinoma: A meta-analysis of randomized trials. OncoTargets and Therapy. 2018;11:7315-21.

51 Guo N, Miao Y, Sun M. Transcatheter hepatic arterial chemoembolization plus cinobufotalin injection adjuvant therapy for advanced hepatocellular carcinoma: A meta-analysis of 27 trials involving 2,079 patients. OncoTargets and Therapy. 2018;11:8835-53.

52 Ou D, Cheng Y, Fu S, Luo D, Qu T, Li Z. Arsenic trioxide combined with TACE for the treatment of advanced primary hepatic carcinoma: Meta-Analysis of its curative effect. Journal of Interventional Radiology (China). 2018;27(6):523-9.

53 Wang H, Yu Z, Liu H. Alternative treatment strategies to sorafenib in patients with advanced hepatocellular carcinoma: A meta-analysis of randomized phase iii trials. OncoTargets and Therapy. 2018;11:5195-201.

54 Wang JN, Cao F, Ye XF, Yan FS, Cheng ZY, Xu S, et al. Stereotactic body radiation therapy combined with transcatheter arterial chemoembolization for primary hepatic carcinoma:A systematic review and Meta analysis. Chinese Journal of Cancer Prevention and Treatment. 2018;25(1):60-7.

55 Xu X-L, Liu X-D, Liang M, Luo B-M. Radiofrequency Ablation versus Hepatic Resection for Small Hepatocellular Carcinoma: Systematic Review of Randomized Controlled Trials with Meta-Analysis and Trial Sequential Analysis. Radiology. 2018;287(2):461-72.

56 Xue JM, Astere M, Zhong MX, Lin H, Shen J, Zhu YX. Efficacy and safety of apatinib treatment for gastric cancer, hepatocellular carcinoma and non-small cell lung cancer: A meta-analysis. OncoTargets and Therapy. 2018;11:6119-28.

57 Zhao H, Zheng M, Wang K, Wang L, He H, Wang M, et al. A meta-analysis of adoptive immunotherapy in postoperative hepatocellular carcinoma. Journal of cancer research and therapeutics. 2018;14(4):807-14.

58 Cabibbo G, Cucchetti A, Camma C, Casadei-Gardini A, Celsa C, Emanuele Maria Rizzo G, et al. Outcomes of hepatocellular carcinoma patients treated with sorafenib: a meta-analysis of Phase III trials. Future oncology (London, England). 2019;15(29):3411-22.

59 Chen J, Yu Z, Yao Y, Jiao D, Han X. Huisheng oral liquid combined with TACE for treatment of primary hepatic carcinoma: Meta-analysis. Chinese Journal of Interventional Imaging and Therapy. 2019;16(9):545-9.

60 Dong Z, Qiu X, Kujawa SA, Islam SMS, Zhang J. Cinobufacini injection for moderate and advanced primary liver cancer: A systematic review and meta-analysis. Journal of Chinese Pharmaceutical Sciences. 2019;28(4):264-75.

61 Huang Y, Cheng X, Sun P, Li T, Song Z, Zheng Q. Supplementary Sorafenib Therapies for Hepatocellular Carcinoma - A Systematic Review and Meta-Analysis: Supplementary Sorafenib for Liver Cancer. Journal of Clinical Gastroenterology. 2019;53(7):486-94.

62 Liu L, Liang J, Deng X. Effects of Aidi Injection () with Western Medical Therapies on Quality of Life for Patients with Primary Liver Cancer: A Systematic Review and Meta-Analysis. Chinese journal of integrative medicine. 2019;25(10):785-90.

63 Lu L, Zeng J, Wen Z, Tang C, Xu N. Transcatheter arterial chemoembolisation followed by three-dimensional conformal radiotherapy versus transcatheter arterial chemoembolisation alone for primary hepatocellular carcinoma in adults. The Cochrane database of systematic reviews. 2019;2:CD012244.

64 Man M, Wang L, Zhou X, Liu Q. TACE combined with radiotherapy for the treatment of mid-stage and advanced liver cancers: A meta-analysis of its clinical efficacy and safety. Journal of Interventional Radiology (China). 2019;28(5):428-35.

65 Ren W, Wang Z, Huang X, Cao G, Sui A, Zhao J, et al. TACE combined with 125I seed implantation vs simple TACE for the treatment of liver cancer: A meta analysis. Journal of Interventional Radiology (China). 2019;28(2):132-7.

66 Wang J, Shen T, Wang Q, Zhang T, Li L, Wang Y, et al. The long-term efficacy of cytokine-induced killer cellular therapy for hepatocellular carcinoma: a meta-analysis. Immunotherapy. 2019;11(15):1325-35.

67 Zhang WQ, Xiao ZL, Wu ZL, Peng LS. Systematic review of external applications combined with three-step analgesic therapy in treating primary liver cancer pain. Zhongguo Zhongyao Zazhi. 2019;44(9):1938-45.

68 Zhu M, Yue L, Lu Y, Wang SM. Efficacy and safety of yttrium-90 radioembolization for unresectable hepatocellular carcinoma: A systematic review and meta analysis. Medical Journal of Chinese People's Liberation Army. 2019;44(10):876-80.

69 Zhu W, Lu X, Liu H, Xu H, Gu Y. Radical resection of liver cancer with subsequent adjuvant transcatheter arterial chemoembolization: Meta analysis of curative effect. Journal of Interventional Radiology (China). 2019;28(9):865-9.

70 Facciorusso A, El Aziz MAA, Tartaglia N, Ramai D, Mohan BP, Cotsoglou C, et al. Microwave ablation versus radiofrequency ablation for treatment of hepatocellular carcinoma: A meta-analysis of randomized controlled trials. Cancers. 2020;12(12):1-11.

71 Jin S, Tan S, Peng W, Jiang Y, Luo C. Radiofrequency ablation versus laparoscopic hepatectomy for treatment of hepatocellular carcinoma: A systematic review and meta-analysis. World Journal of Surgical Oncology. 2020;18(1):199.

72 Li S, Sun S, Xiang H, Yang J, Peng M, Gao Q. Liver metastases and the efficacy of the PD-1 or PD-L1 inhibitors in cancer: a meta-analysis of randomized controlled trials. OncoImmunology. 2020;9(1):1746113.

73 Ricci AD, Rizzo A, Bonucci C, Tavolari S, Palloni A, Frega G, et al. The (Eternal) Debate on Microwave Ablation Versus Radiofrequency Ablation in BCLC-A Hepatocellular Carcinoma. In vivo (Athens, Greece). 2020;34(6):3421-9.

74 Venerito M, Pech M, Canbay A, Donghia R, Guerra V, Chatellier G, et al. NEMESIS: Noninferiority, Individual-Patient Metaanalysis of Selective Internal Radiation Therapy with 90Y Resin Microspheres Versus Sorafenib in Advanced Hepatocellular Carcinoma. Journal of nuclear medicine : official publication, Society of Nuclear Medicine. 2020;61(12):1736-42.

75 Wang H, Cao C, Wei X, Shen K, Shu Y, Wan X, et al. A comparison between drug-eluting bead-transarterial chemoembolization and conventional transarterial chemoembolization in patients with hepatocellular carcinoma: A meta-analysis of six randomized controlled trials. Journal of Cancer Research and Therapeutics. 2020;16(2):243-9.

76 Xu H, Wei W, Y M, Dong C. Efficacy and safety of Chinese patent medicine (Jinlong capsule) in the treatment of advanced hepatocellular carcinoma: a meta-analysis. Bioscience reports. 2020;40(1).

77 Yang Z, Deng J, Zhang H, Yin J, Kong S. Meta-Analysis of Efficacy and Safety of Transcatheter Arterial Chemoembolization Combined with Apatinib for Moderate and Advanced Liver Cancer. Anti-Tumor Pharmacy. 2020;10(5):600-7.

78 Yu C, Wu S, Zhao J, Lu J, Zhao T, Wei Y, et al. Evaluation of efficacy, safety and treatment-related outcomes of percutaneous radiofrequency ablation versus partial hepatectomy for small primary liver cancer meeting the Milan criteria: A systematic review and meta-analysis of randomized controlled trials. Clinics and Research in Hepatology and Gastroenterology. 2020;44(5):718-32.

79 Bosma NA, Keehn AR, Lee-Ying R, Karim S, MacLean AR, Brenner DR. Efficacy of perioperative chemotherapy in resected colorectal liver metastasis: A systematic review and meta-analysis. European journal of surgical oncology : the journal of the European Society of Surgical Oncology and the British Association of Surgical Oncology. 2021;47(12):3113-22.

80 Dai Y, Jiang H, Zhao S, Zeng X, Sun R, Zheng R. Optimal timing of combining sorafenib with trans-arterial chemoembolization in patients with hepatocellular carcinoma: A meta-analysis. Translational Oncology. 2021;14(12):101238.

81 Esagian SM, Kakos CD, Giorgakis E, Burdine L, Barreto JC, Mavros MN. Adjuvant transarterial chemoembolization following curative-intent hepatectomy versus hepatectomy alone for hepatocellular carcinoma: A systematic review and meta-analysis of randomized controlled trials. Cancers. 2021;13(12):2984.

82 Haber PK, Puigvehi M, Castet F, Lourdusamy V, Montal R, Tabrizian P, et al. Evidence-Based Management of Hepatocellular Carcinoma: Systematic Review and Meta-analysis of Randomized Controlled Trials (2002-2020). Gastroenterology. 2021;161(3):879-98.

83 Jacome AA, Castro ACG, Vasconcelos JPS, Silva MHCR, Lessa MAO, Moraes ED, et al. Efficacy and Safety Associated With Immune Checkpoint Inhibitors in Unresectable Hepatocellular Carcinoma: A Meta-analysis. JAMA network open. 2021;4(12):e2136128.

84 Jia Z, Zhang H, Li N. Evaluation of clinical outcomes of radiofrequency ablation and surgical resection for hepatocellular carcinoma conforming to the Milan criteria: A systematic review and meta-analysis of recent randomized controlled trials. Journal of Gastroenterology and Hepatology (Australia). 2021;36(7):1769-77.

85 Khan A, Mostowy M, Owusu M, Mutambanengwe M, Habimana S, Bence S, et al. Microwave ablation determines similar survival outcomes as compared to radiofrequency ablation for the treatment of hepatocellular carcinoma. Expert Review of Gastroenterology and Hepatology. 2021;15(7):829-33.

86 Lemieux S, Buies A, F Turgeon A, Hallet J, Daigle G, Cote F, et al. Effect of Yttrium-90 transarterial radioembolization in patients with non-surgical hepatocellular carcinoma: A systematic review and meta-analysis. PloS one. 2021;16(3):e0247958.

87 Li D, Pang Y, Xu L, Xu X. Efficacy and safety of sorafenib combined with TACE in the treatment of advanced hepatocellular carcinoma: A meta-analysis. Journal of BUON : official journal of the Balkan Union of Oncology. 2021;26(4):1355-64.

88 Niu X, Liu J, Feng Z, Zhang T, Su T, Han W. Short-term efficacy of precise hepatectomy and traditional hepatectomy for primary liver cancer: a systematic review and meta-analysis. Journal of Gastrointestinal Oncology. 2021;13(6):3022-32.

89 Regmi P, Hu HJ, Lv TR, Paudyal A, Sah RB, Ma WJ, et al. Efficacy and safety of sorafenib plus hepatic arterial infusion chemotherapy for advanced hepatocellular carcinoma. Surgical Oncology. 2021;39:101663.

90 She Y, Huang Q, Ye Z, Hu Y, Wu M, Qin K, et al. The Therapeutic Principle of Combined Strengthening Qi and Eliminating Pathogens in Treating Middle-Advanced Primary Liver Cancer: A Systematic Review and Meta-Analysis. Frontiers in Pharmacology. 2021;12:714287.

91 Sun C, Dong F, Xiao T, Gao W. Efficacy and safety of Chinese patent medicine (Kang-ai injection) as an adjuvant in the treatment of patients with hepatocellular carcinoma: a meta-analysis. Pharmaceutical Biology. 2021;59(1):472-83.

92 Wang Q, Tang M, Zhang S. Comparison of radiofrequency ablation and surgical resection for hepatocellular carcinoma conforming to the Milan criteria: a meta-analysis. ANZ journal of surgery. 2021;91(7-8):E432-E8.

93 Yu Q, Liu C, Navuluri R, Ahmed O. Percutaneous microwave ablation versus radiofrequency ablation of hepatocellular carcinoma: a meta-analysis of randomized controlled trials. Abdominal Radiology. 2021;46(9):4467-75.

94 Zhang RR, Shao MY, Fu Y, Zhao RX, Wang JW, Li M, et al. Systematic evaluation of Huaier Granules adjuvant treatment of primary liver cancer. Zhongguo Zhongyao Zazhi. 2021;46(2):478-87.

95 Zhu H, Wang S-Y, Zhu J-H, Liu H, Kong M, Mao Q, et al. Efficacy and safety of transcatheter arterial chemoembolization combined with ginsenosides in hepatocellular carcinoma treatment. Phytomedicine : international journal of phytotherapy and phytopharmacology. 2021;91:153700.

96 Gong A, Li X. The efficacy and safety of Apatinib combined with TACE in the treatment of hepatocellular carcinoma: a meta-analysis. World journal of surgical oncology. 2022;20(1):69.

97 Guven DC, Erul E, Sahin TK, Dizdar O, Yalcin S, Sahin IH. The benefit of immunotherapy in patients with hepatocellular carcinoma: a systematic review and meta-analysis. Future Oncology. 2022;18(37):4119-36.

98 Hou JP, Shi YB, Fu YF, Li H. I-125 seeds insertion with TACE for advanced HCC: a meta-analysis of randomized controlled trials. Minimally Invasive Therapy and Allied Technologies. 2022;31(6):848-55.

99 Hu J, Mao H, He Y. Systematic review and meta-analysis of the efficacy and safety of high-intensity focused ultrasound combined with transarterial chemoembolization and transarterial chemoembolization alone in the treatment of liver cancer. Translational Cancer Research. 2022;11(6):1678-88.

100 Kudo M, Montal R, Finn RS, Castet F, Ueshima K, Nishida N, et al. Objective Response Predicts Survival in Advanced Hepatocellular Carcinoma Treated with Systemic Therapies. Clinical cancer research : an official journal of the American Association for Cancer Research. 2022;28(16):3443-51.

101 Li Y, Hao M, Zhang B, Wang P, Zhang D, Lu S, et al. Meta-analysis of the efficacy of glycyrrhizin for postoperative liver preservation in patients with liver cancer. Journal of cancer research and therapeutics. 2022;18(2):461-9.

102 Lu DE, Cheng SW, Lin YS, Tu MW, Lee CH, Chen C, et al. Combination of radiofrequency ablation and percutaneous ethanol injection versus radiofrequency ablation alone for hepatocellular carcinoma: a systematic review and meta-analysis. Annals of Hepatology. 2022;27(5):100729.

103 Luo GL, Guo BQ, Wu LX, Shen YX, Xie T. Application of Tivantinib for Hepatocellular Carcinoma: A Meta-Analysis Study. Evidence-based Complementary and Alternative Medicine. 2022;2022:1976788.

104 Wang YB, Ma R, Wang ZB, Shi QL, Zhang L, Chen WZ, et al. Transcatheter Arterial Chemoembolization in Combination With High-Intensity Focused Ultrasound for Intermediate and Advanced Hepatocellular Carcinoma: A Meta-Analysis. Frontiers in Oncology. 2022;12:797349.

105 Yang T-K, Yu Y-F, Tsai C-L, Li H-J, Yang P-S, Huang K-W, et al. Efficacy and safety of combined targeted therapy and immunotherapy versus targeted monotherapy in unresectable hepatocellular carcinoma: a systematic review and meta-analysis. BMC cancer. 2022;22(1):1085.

106 Yu Y, Fu J, Xia P, Chu C. A systematic review and meta-analysis on the efficacy and safety of transcatheter arterial chemoembolization combined with radiofrequency ablation in the treatment of primary liver cancer. Translational Cancer Research. 2022;11(5):1297-308.

107 Zeng L, Su J, Qiu W, Jin X, Qiu Y, Yu W. Survival Outcomes and Safety of Programmed Cell Death/Programmed Cell Death Ligand 1 Inhibitors for Unresectable Hepatocellular Carcinoma: Result From Phase III Trials. Cancer Control. 2022 Apr 14;29.

108 Dong H, Ge D, Qu B, Zhu P, Wu Q, Wang T, et al. Transarterial chemoembolization with or without multikinase inhibitors for patients with unresectable hepatocellular carcinoma: a systematic review and meta-analysis of randomized controlled trials. Frontiers in Oncology. 2023;13:1139025.

109 Huang D, Ke L, Cui H, Li S. Efficacy and safety of PD-1/PD-L1 inhibitors combined with anti-angiogenic therapy for the unresectable hepatocellular carcinoma and the benefit for hepatitis B virus etiology subgroup: a systematic review and meta-analysis of randomized controlled trials. BMC cancer. 2023;23(1):474.

110 Kim HJ, Lee SH, Shim HJ, Bang HJ, Cho SH, Chung IJ, et al. Hepatic arterial infusion chemotherapy versus systemic therapy for advanced hepatocellular carcinoma: a systematic review and meta-analysis. Frontiers in Oncology. 2023;13:1265240.

111 Lawson A, Kamarajah SK, Parente A, Pufal K, Sundareyan R, Pawlik TM, et al. Outcomes of Transarterial Embolisation (TAE) vs. Transarterial Chemoembolisation (TACE) for Hepatocellular Carcinoma: A Systematic Review and Meta-Analysis. Cancers. 2023;15(12):3166.

112 Liu H, Yang C-C, Ma Y-L, Yang Y-F, Yan L-J, Ding Z-N, et al. Identification of the most effective subgroup of advanced hepatocellular carcinoma from immune checkpoint blocker treatment: a meta-analysis. Immunotherapy. 2023;15(9):669-78.

113 Lu W, Qu J, Yan L, Tang X, Wang X, Ye A, et al. Efficacy and safety of mesenchymal stem cell therapy in liver cirrhosis: a systematic review and meta-analysis. Stem cell research & therapy. 2023;14(1):301.

114 Peng P, Wen B, Chen R, Deng X. Sorafenib Plus Hepatic Arterial Infusion Chemotherapy in Advanced Hepatocellular Carcinoma: A Systematic Review and Meta-analysis. The Turkish journal of gastroenterology : the official journal of Turkish Society of Gastroenterology. 2023;34(4):311-21.

115 Rizzo A, Ricci AD, Fanizzi A, Massafra R, De Luca R, Brandi G. Immune-Based Combinations versus Sorafenib as First-Line Treatment for Advanced Hepatocellular Carcinoma: A Meta-Analysis. Current oncology (Toronto, Ont). 2023;30(1):749-57.

116 Yang W, Li X, He J, Xuan Q, Si H, Yao W. Efficacy and safety of immune checkpoint inhibitors combined with anti-VEGF therapy in the treatment of unresectable or advanced liver cancer: a systematic review. Immunopharmacology and Immunotoxicology. 2023.

117 Yuanren G, Yin L, Liu R, Cui Y. The treatment of transarterial chemoembolization/hepatic arterial infusion chemotherapy combined with lenvatinib and PD-1 inhibitor is effective against hepatocellular carcinoma with portal vein tumor thrombus: A systematic review. Frontiers in Oncology. 2023;13:1054072.

118 Zhou X, Cao J, Topatana W, Xie T, Chen T, Hu J, et al. Evaluation of PD-L1 as a biomarker for immunotherapy for hepatocellular carcinoma: systematic review and meta-analysis. Immunotherapy. 2023;15(5):353-65.

119 Wang Y, Lin W, Huang G, Nie S, Yu Q, Hou F, et al. The therapeutic principle of combined clearing heat and resolving toxin plus TACE on primary liver cancer: A systematic review and meta-analysis. Journal of Ethnopharmacology. 2024;319:117072.
